# Supplementary material for: “Instant enemies” and “Instant allies” in the U.S. and Taiwan: a LIWC analysis
Source: Frontiers journal article supplement (doi:10.3389/fcomm.2023.1036770), 2023-05-22
Supplement: Data_Sheet_1.pdf [file Data_Sheet_1.pdf]

### Appendix 3

The instructions [and sample test boxes] that were provided to the participants

#### Instant Ally

Almost all of us have had the experience of meeting a stranger and discovering very quickly that we were “instant allies.” For example, we discovered that we were political allies: both of us being staunch conservatives or both of us being staunch liberals. Or we discovered that we came from the same high school or the same college that we both identified with strongly. Or we discovered that we came from the same religious tradition and shared the same core beliefs. Or we discovered that we were both friends with the same person—someone we both liked and admired. Or we discovered that we were affiliated with the same team, group, social cause, or organization that we both identified with strongly. These are just some examples; there are many others.

Please think about this concept of “instant allies” and then write a paragraph in which you describe an actual (and preferably recent) incident from your own life in which you found yourself in the presence of a stranger who you discovered was an “instant ally.” When you are ready to begin, type this paragraph into the box provided below. In relating this incident, be sure to explain what led you to realize that you were in the presence of an “instant ally.” Then go on to describe in some detail what happened after that.

**When you have finished writing your paragraph about this incident, click on the NEXT command to save the paragraph you just wrote. Additional instructions will appear at that point.**

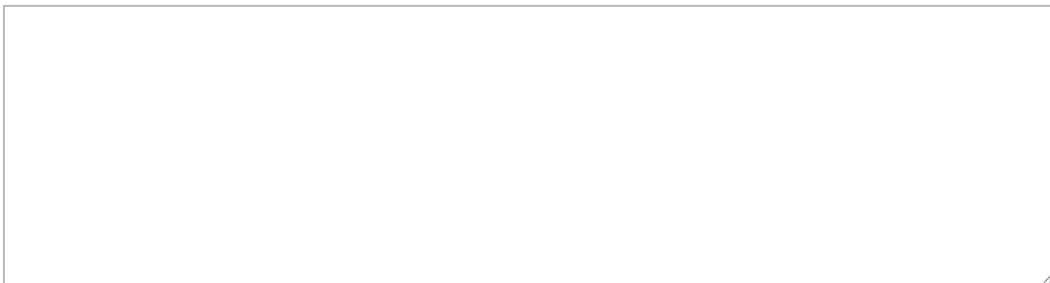

Prev

Next

## Instant Enemy

Almost all of us have had the experience of meeting a stranger and discovering very quickly that we were “instant enemies.” For example, we discovered that we were political opposites: one of us being a staunch conservative and the other one being a staunch liberal. Or we discovered that we came from different high schools or from different colleges that were intense rivals in athletic competitions. Or we discovered that we came from different religious traditions whose core beliefs clashed with and contradicted each other. Or we discovered that we both wanted to date the same person. Or we discovered that we were affiliated with different teams, groups, social causes, or organizations whose goals were in direct competition with each other. These are just some examples; there are many others.

Please think about this concept of “instant enemies” and then write a paragraph in which you describe an actual (and preferably recent) incident from your own life in which you found yourself in the presence of a stranger who you discovered was an “instant enemy.” When you are ready to begin, type this paragraph into the box provided below. In relating this incident, be sure to explain what led you to realize that you were in the presence of an “instant enemy.” Then go on to describe in some detail what happened after that.

**When you have finished writing your paragraph about this incident, click on the NEXT command to save the paragraph you just wrote. Additional instructions will appear at that point.**

Prev

Next
